# Supplementary material for: Health economic analysis of ticagrelor in patients with acute coronary syndromes intended for non-invasive therapy
Source: PubMed Central journal article supplement — Heart. 2014 Sep 16;101(2):119–25. doi: 10.1136/heartjnl-2014-305864 (PMC4316918; doi:10.1136/heartjnl-2014-305864), 2014-09-16
Supplement: heartjnl-2014-305864-s1.pdf [file heartjnl-2014-305864-s1.pdf]

## Supplementary material

**Supplementary Table 1** Resource-use items and unit costs in € (2010)

| Resource                              | Sweden | UK   | Germany | Brazil |
|---------------------------------------|--------|------|---------|--------|
| <b>Hospitalisations</b>               |        |      |         |        |
| Bed day: cardiology ward              | 466    | 344  | 281     | 35     |
| Bed day: general ward                 | 450    | 320  | 281     | 36     |
| Bed day: coronary care unit           | 883    | 567  | 612     | 205    |
| Bed day: thoracic intensive care unit | 3146   | 1495 | 944     | 205    |
| Bed day: intensive care unit          | 3146   | 1764 | 944     | 205    |
| <b>Investigations</b>                 |        |      |         |        |
| Stress test                           | 146    | 82   | 40      | 13     |
| Echocardiography                      | 267    | 85   | 31      | 17     |
| Myocardial scintigraphy               | 555    | 365  | 90      | 175    |
| Electrophysiology study               | 4538   | 2810 | 1697    | 1104   |
| Holter study                          | 216    | 642  | 36      | 13     |
| Ventilation/perfusion scan            | 266    | 468  | 117     | 56     |
| Pulmonary angiography                 | 1554   | 1093 | 179     | 86     |
| Coronary angiography                  | 1057   | 1093 | 462     | 264    |
| Computer tomography                   |        |      |         |        |
| Head/brain                            | 206    | 122  | 179     | 42     |
| Spinal                                | 342    | 122  | 170     | 118    |
| Chest                                 | 217    | 122  | 206     | 59     |
| Helical                               | 403    | 122  | 277     | 59     |
| Abdomen                               | 273    | 122  | 233     | 59     |
| Extremity                             | 279    | 122  | 170     | 37     |
| Magnetic resonance imaging            |        |      |         |        |
| Head/brain                            | 372    | 247  | 394     | 115    |
| Spinal                                | 468    | 247  | 376     | 115    |

|                                   |        |        |        |      |
|-----------------------------------|--------|--------|--------|------|
| Chest                             | 353    | 247    | 385    | 115  |
| Abdomen                           | 547    | 247    | 394    | 115  |
| Extremity                         | 343    | 247    | 286    | 231  |
| <b>Interventions</b>              |        |        |        |      |
| Pacemaker                         | 6079   | 2963   | 3658   | 2272 |
| Implantable cardiac defibrillator | 25 319 | 10 752 | 14 929 | 2272 |
| Intra-aortic balloon pump         | 3359   | 1187   | 1246   | 782  |
| Left ventricular assist device    | 23 067 | 40 374 | 42 391 | 0    |
| PCI without stent                 | 1867   | 2527   | 2735   | 750  |
| PCI with stent (excl. stent cost) | 1867   | 3445   | 2735   | 676  |
| Bare metal stent                  | 535    | 153    | 271    | 873  |
| Drug eluting stent                | 1069   | 617    | 1083   | 873  |
| CABG without valve replacement    | 10 485 | 10 832 | 6701   | 3665 |
| CABG with valve replacement       | 14 679 | 10 892 | 8267   | 4411 |
| <b>Bleeding related</b>           |        |        |        |      |
| Reoperation due to bleedings      | 5243   | 10 791 | 5170   | 424  |
| Units of packed red blood cells   | 103    | 163    | 87     | 4    |
| Units of whole blood              | 119    | 163    | 202    | 4    |
| Units of fresh frozen plasma      | 38     | 42     | 42     | 4    |
| Units of platelets                | 205    | 271    | 364    | 4    |

---

CABG, coronary artery bypass graft; PCI, percutaneous coronary intervention

**Supplementary Table 2** Total resource use by treatment group in the planned non-invasive PLATO population

| Resource use item                    | Index hospitalisation |             |            | Post index hospitalisation |             |            | Full study period |             |            |
|--------------------------------------|-----------------------|-------------|------------|----------------------------|-------------|------------|-------------------|-------------|------------|
|                                      | Ticagrelor            | Clopidogrel | Difference | Ticagrelor                 | Clopidogrel | Difference | Ticagrelor        | Clopidogrel | Difference |
|                                      | (n=1499)              | (n=1516)    |            | (n=1499)                   | (n=1516)    |            | (n=1499)          | (n=1516)    |            |
| <b>Hospitalisations</b>              |                       |             |            |                            |             |            |                   |             |            |
| Bed day cardiology ward              | 10 962                | 11 214      | -252       | N/A                        | N/A         | N/A        | 10 962            | 11 214      | -252       |
| Bed day general ward                 | N/A                   | N/A         | N/A        | 6030                       | 6894        | -864       | 6030              | 6894        | -864       |
| Bed day coronary care unit           | 2988                  | 3020        | -32        | 475                        | 695         | -220       | 3463              | 3715        | -252       |
| Bed day thoracic intensive care unit | N/A                   | N/A         | N/A        | 269                        | 338         | -69        | 269               | 338         | -69        |
| Bed day intensive care unit          | N/A                   | N/A         | N/A        | 202                        | 233         | -31        | 202               | 233         | -31        |
| <b>Investigations</b>                |                       |             |            |                            |             |            |                   |             |            |
| Stress test                          | 197                   | 208         | -11        | 194                        | 215         | -21        | 391               | 423         | -32        |
| Echocardiography                     | 801                   | 825         | -24        | 342                        | 370         | -28        | 1143              | 1195        | -52        |
| Myocardial scintigraphy              | 15                    | 8           | 7          | 27                         | 31          | -4         | 42                | 39          | 3          |
| Electrophysiology study              | 0                     | 1           | -1         | 4                          | 1           | 3          | 4                 | 2           | 2          |
| Holter study                         | 36                    | 38          | -2         | 24                         | 24          | 0          | 60                | 62          | -2         |
| Ventilation/perfusion scan           | 1                     | 1           | 0          | 3                          | 1           | 2          | 4                 | 2           | 2          |
| Pulmonary angiography                | 1                     | 2           | -1         | 2                          | 0           | 2          | 3                 | 2           | 1          |



|                                   |     |     |     |     |     |     |     |     |      |
|-----------------------------------|-----|-----|-----|-----|-----|-----|-----|-----|------|
| PCI without stent                 | 12  | 27  | -15 | 18  | 15  | 3   | 30  | 42  | -12  |
| PCI with stent (excl. stent cost) | 290 | 296 | -6  | 152 | 195 | -43 | 442 | 491 | -49  |
| Number of bare metal stent        | 267 | 256 | 11  | 141 | 166 | -25 | 408 | 422 | -14  |
| Number of drug eluting stent      | 152 | 189 | -37 | 88  | 102 | -14 | 240 | 291 | -51  |
| <b>CABG</b>                       |     |     |     |     |     |     |     |     |      |
| Without valve replacement         | 68  | 60  | 8   | 101 | 88  | 13  | 169 | 148 | 21   |
| With valve replacement            | 6   | 3   | 3   | 4   | 9   | -5  | 10  | 12  | -2   |
| <b>Bleeding related*</b>          |     |     |     |     |     |     |     |     |      |
| Reoperation due to bleedings      | 6   | 4   | 2   | 5   | 0   | 5   | 11  | 4   | 7    |
| Units of packed red blood cells   | 148 | 188 | -40 | 183 | 245 | -62 | 331 | 433 | -102 |
| Units of whole blood              | 34  | 18  | 16  | 40  | 69  | -29 | 74  | 87  | -13  |
| Units of fresh frozen plasma      | 71  | 100 | -29 | 71  | 42  | 29  | 142 | 142 | 0    |
| Units of platelets                | 61  | 126 | -65 | 63  | 22  | 41  | 124 | 148 | -24  |

---

CABG, coronary artery bypass graft; PCI, percutaneous coronary intervention

\* Bed days due to bleedings are included in hospitalisations.

**Supplementary Table 3** Mean healthcare costs per patient at 12 months

| Health-care costs (€) | Ticagrel<br>or<br>(n=1499) | Clopidogrel<br>(n=1516) | Difference<br>(95% CI)          | Ticagrel<br>or<br>(n=1499) | Clopidogrel<br>(n=1516) | Difference<br>(95% CI)           | Ticagrel<br>or<br>(n=1499) | Clopidogrel<br>(n=1516) | Difference<br>(95% CI)           | Ticagrel<br>or<br>(n=1499) | Clopidogrel<br>(n=1516) | Difference<br>(95% CI)          |
|-----------------------|----------------------------|-------------------------|---------------------------------|----------------------------|-------------------------|----------------------------------|----------------------------|-------------------------|----------------------------------|----------------------------|-------------------------|---------------------------------|
| Bed days              | 8247                       | 8842                    | -596<br>(-1246, 55)             | 5619                       | 5994                    | - 375<br>(-784, 34)              | 4896                       | 5211                    | -316<br>(-642, 11)               | 942                        | 1005                    | -63<br>(-7,-119)                |
| Investigations        | 975                        | 970                     | 4<br>(-56, 65)                  | 839                        | 832                     | 7<br>(-48, 62)                   | 356                        | 352                     | 4<br>(-20, 28)                   | 198                        | 196                     | 2<br>(-11, 15)                  |
| Interventions         | 2364                       | 2287                    | 77<br>(-213, 367)               | 2577                       | 2551                    | 26<br>(-249, 303)                | 2022                       | 2042                    | -20<br>(-230, 189)               | 1060                       | 1073                    | -12<br>(-121, 97)               |
| Bleeding<br>related   | 88                         | 74                      | 14<br>(-35, 64)                 | 150                        | 114                     | 35<br>(-50, 120)                 | 101                        | 89                      | 12<br>(-53,76)                   | 4                          | 3                       | 1<br>(-1, 4)                    |
| Study drugs           | 596                        | 17                      | 579<br>(564, 595)               | 612                        | 20                      | 592<br>(577, 608)                | 795                        | 102                     | 693<br>(672, 714)                | 631                        | 144                     | 487<br>(471, 504)               |
| <b>Total costs</b>    | <b>12 268</b>              | <b>12 189</b>           | <b>79</b><br><b>(-775, 933)</b> | <b>9 797</b>               | <b>9 511</b>            | <b>286</b><br><b>(-349, 921)</b> | <b>8170</b>                | <b>7798</b>             | <b>372</b><br><b>(-106, 850)</b> | <b>2837</b>                | <b>2420</b>             | <b>416</b><br><b>(268, 563)</b> |

CI, confidence interval
